# Supplementary material for: Effects of defoliation and nitrogen on carbon dioxide (CO2) emissions and microbial communities in soils of cherry tree orchards
Source: PeerJ. 2023 May 8;11:e15276. doi: 10.7717/peerj.15276 (PMC10174058; doi:10.7717/peerj.15276)
Supplement: Supplemental Information 2 [file peerj-11-15276-s002.xlsx]

## Sheet: sheet1
TREATMENT	Pro	Aci	Acti	Bact	Gem	Firm	Chlor	Nit	oth	A	N	CO2S	CO2L	MBC	PIindex	catalas	alkaline phosphatase	cellulase
TN0C0	0.355162	0.254997	0.0940871	0.0774032	0.0622407	0.0288728	0.01926	0.0156639	0.0923139	0	0	36	0.708	241.655		19.639	15.8	0.88
TN0C0	0.3989	0.231959	0.100888	0.0877874	0.0508559	0.0497399	0.0200711	0.0155899	0.044209	0	0	37.5	0.69	281.655		20.269	14.9	0.95
TN0C0	0.381177	0.248796	0.0895478	0.0616227	0.0577619	0.0230898	0.018498	0.01698	0.102528	0	0	34.5	0.687	231.655		20.269	15.2	0.93
TN0C-1	0.419831	0.235387	0.102623	0.0413036	0.0320459	0.0678133	0.0110642	0.0100181	0.0799137	1	0	43.5	1.212	363.389	1.28696	15.939	30.09	1.77
TN0C-3	0.415758	0.227844	0.0973831	0.0734705	0.0552187	0.0628558	0.0227644	0.0126916	0.0320136	1	0	46.5	1.194	447.642	1.29651	15.309	27.69	1.83
TN0C-4	0.459883	0.243123	0.104233	0.057218	0.0392577	0.0463251	0.0114208	0.014744	0.023795	1	0	51	1.188	447.642	1.2936	15.309	31.22	2.06
TNLC0-2	0.463041	0.181356	0.0815126	0.0736383	0.0556956	0.0259882	0.0158886	0.0226268	0.0802532	0	90	24	0.603	202.206	-0.58048	15.309	14.1655	0.84
TNLC0-3	0.451492	0.179423	0.0957987	0.0739513	0.0630916	0.0234812	0.0196851	0.0210946	0.0719821	0	90	25.5	0.615	168.505	-0.57595	14.049	18.1655	0.9
TNLC0-4	0.443511	0.170404	0.0875391	0.0714366	0.0634785	0.0210974	0.0209855	0.0193082	0.10224	0	90	30	0.615	185.356	-0.57795	14.049	13.1655	0.77
TNLC-1	0.429546	0.247435	0.0902621	0.0811588	0.0534041	0.0303641	0.0176432	0.0215129	0.0286739	1	90	42	1.023	494.642	1.1148	24.129	33.31	2.44
TNLC-2	0.449836	0.227926	0.106854	0.0687557	0.067061	0.0200997	0.0225231	0.0165915	0.0203539	1	90	43.5	1.02	467.642	1.02687	22.239	32.45	2
TNLC-3	0.481294	0.205832	0.104527	0.069775	0.0533584	0.0285254	0.0200004	0.0175207	0.0191678	1	90	42	1.053	457.642	1.0991	23.499	31.78	2.28
TNHC0-2	0.480598	0.196547	0.098596	0.0613988	0.0623062	0.0184961	0.0189063	0.0168366	0.0463151	0	135	10.5	0.408	199.884	-0.27826	18.459	20.9884	0.93
TNHC0-3	0.470116	0.213928	0.114553	0.0670579	0.0686425	0.0291571	0.0190185	0.0215531	-0.00402616	0	135	13.5	0.426	215.947	-0.27035	19.089	21.5947	0.77
TNHC0-4	0.448362	0.223987	0.113506	0.0440618	0.0633065	0.0177358	0.0178654	0.023586	0.0475897	0	135	16.5	0.45	235.947	-0.22965	20.979	22.5947	0.88
TNHC-1	0.447585	0.226726	0.11667	0.0383962	0.0634642	0.0421338	0.00996262	0.0218315	0.0332304	1	135	19.5	0.939	484.453	0.86667	31.429	34.68	2.56
TNHC-2	0.446934	0.206345	0.126609	0.0481853	0.0696191	0.0399967	0.0156796	0.0311205	0.0155107	1	135	22.5	1.005	526.579	0.93023	29.429	30.22	2.64
TNHC-3	0.432961	0.220272	0.107881	0.0684949	0.051415	0.0414787	0.0191434	0.0204441	0.0379097	1	135	21	1.035	484.453	0.97674	28.429	35.19	2.7
MN0C0-1	0.474027	0.210326	0.101059	0.0422397	0.0652827	0.0187751	0.0187049	0.0195128	0.0500724	0	0	12	0.66	263.389		17.749	11.73	0.64
MN0C0-2	0.453783	0.226737	0.122722	0.06371	0.0739292	0.0201276	0.0167456	0.0164165	0.00582954	0	0	13.5	0.693	198.389		19.009	14.44	0.7
MN0C0-3	0.442924	0.249389	0.113675	0.0504295	0.0817148	0.0164065	0.0203345	0.0182514	0.00687573	0	0	16.5	0.684	203.389		19.639	12.63	0.62
MN0C-1	0.500611	0.203493	0.12783	0.0469513	0.0434239	0.026639	0.0171674	0.0160944	0.0177899	1	0	33	1.242	394.884	1.41333	15.939	18.88	1.47
MN0C-2	0.483735	0.206166	0.127144	0.0629571	0.0553811	0.0241926	0.0204138	0.0119918	0.00801797	1	0	34.5	1.236	352.758	1.34091	14.679	17.27	1.6
MN0C-4	0.483859	0.217359	0.1142	0.0827393	0.0527792	0.0254253	0.0167601	0.0116275	-0.00474998	1	0	39	1.218	352.758	1.40924	14.679	17.27	1.51
MNLC0-2	0.489804	0.213676	0.0635082	0.0703662	0.0604646	0.0188293	0.0165365	0.0188698	0.0479456	0	90	15	0.54	151.655	-0.06	14.679	8.65	0.66
MNLC0-3	0.529276	0.186486	0.0912584	0.0505509	0.0568857	0.0294986	0.0193535	0.0225129	0.0141778	0	90	16.5	0.552	185.356	-0.05519	15.939	9.64	0.72
MNLC0-4	0.512569	0.206825	0.0742585	0.0516741	0.0709508	0.0181925	0.019387	0.0243118	0.021831	0	90	16.5	0.534	168.505	-0.05611	14.679	8.87	0.68
MNLC-1	0.530493	0.174842	0.0685243	0.0435602	0.0614984	0.029078	0.0184764	0.0241868	0.0493408	1	90	34.5	1.074	421.263	1.28333	22.239	17.82	1.51
MNLC-2	0.583348	0.171262	0.0711332	0.0320563	0.0296271	0.0272234	0.0112485	0.0116374	0.0624643	1	90	36	1.104	379.137	1.18506	22.239	19.04	1.46
MNLC-4	0.541096	0.182908	0.0742459	0.0316786	0.0427311	0.0236661	0.0138174	0.0198759	0.0699806	1	90	39	1.116	337.011	1.26733	22.869	17.01	1.65
MNHC0-1	0.546105	0.19984	0.0590458	0.0604987	0.0574475	0.0173995	0.0150566	0.0239561	0.0206506	0	135	10.5	0.432	116.379	-0.23	22.239	13.3	0.74
MNHC0-3	0.523987	0.205851	0.0681962	0.0668523	0.0578016	0.0136328	0.0161747	0.027557	0.0199472	0	135	12	0.459	147.442	-0.17532	22.239	14.26	0.66
MNHC0-4	0.517219	0.199049	0.0734946	0.0548855	0.0720702	0.0163577	0.01877	0.025869	0.022285	0	135	15	0.468	146.379	-0.19802	21.609	14.27	0.57
MNHC-1	0.518853	0.202913	0.0695316	0.0713477	0.0545177	0.024256	0.0142767	0.0234649	0.0208397	1	135	22.5	0.903	421.263	1.04333	26.649	21.26	2.38
MNHC-2	0.548788	0.17772	0.0727111	0.0528214	0.0734645	0.0117201	0.0205506	0.0173143	0.0249102	1	135	27	0.948	463.389	1.06169	27.279	23.13	2.3
MNHC-4	0.540177	0.184457	0.0806816	0.0647453	0.0575361	0.0192649	0.0168331	0.0206964	0.0156086	1	135	24	0.951	421.263	1.05281	27.279	23.39	2.55
DN0C0-2	0.430565	0.237724	0.091047	0.0568515	0.0699826	0.0475255	0.0183536	0.0161154	0.0318354	0	0	7.5	0.441	102.126		6.339	5.13	0.38
DN0C0-3	0.397385	0.226682	0.116601	0.059425	0.0573217	0.0835962	0.0188969	0.0160009	0.0240903	0	0	10.5	0.423	122.126		4.709	5.22	0.45
DN0C0-4	0.450963	0.224503	0.108723	0.0417984	0.0668818	0.0449607	0.0184145	0.0204582	0.0232978	0	0	12	0.414	131.595		4.079	4.81	0.33
DN0C-2	0.448643	0.188865	0.0935467	0.0344883	0.0484466	0.0923875	0.0185805	0.0193212	0.0557216	1	0	22.5	0.846	158.074	1.93874	9.639	5.87	0.97
DN0C-3	0.463993	0.194878	0.0907489	0.0465434	0.0480167	0.0855838	0.0157543	0.0224804	0.032002	1	0	25.5	0.858	115.947	2.10753	9.009	5.95	0.93
DN0C-4	0.434676	0.228733	0.117853	0.0488431	0.0512513	0.0851394	0.0174787	0.0181209	-0.00209579	1	0	24	0.852	115.947	2.11372	9.009	5.99	1.06
DNLC0-1	0.470728	0.199704	0.09253	0.0551949	0.0588558	0.0626056	0.0186009	0.0217875	0.0199941	0	90	6	0.39	115.847	-0.10494	8.694	7.85	0.44
DNLC0-2	0.45494	0.219545	0.0879563	0.062681	0.072232	0.0289694	0.0170222	0.0247263	0.0319279	0	90	4.5	0.384	94.7842	-0.08065	9.009	8.58	0.3
DNLC0-3	0.450707	0.209369	0.100994	0.0462524	0.092696	0.0278776	0.0208031	0.0285086	0.0227916	0	90	9	0.375	105.316	-0.12816	9.009	9.05	0.37
DNLC-2	0.570582	0.15955	0.0997946	0.0366379	0.0449906	0.0542181	0.0159786	0.0198848	-0.00163658	1	90	31.5	0.834	210.632	1.8094	9.009	10.63	1.32
DNLC-3	0.578843	0.189213	0.108126	0.0349819	0.017648	0.0255324	0.0132416	0.0192661	0.0131471	1	90	37.5	0.834	189.568	1.86022	9.639	9.57	1.4
DNLC-4	0.596149	0.181814	0.103746	0.0416567	0.01442	0.0222716	0.00839689	0.0182951	0.0132514	1	90	34.5	0.831	168.505	1.81588	9.324	10.51	1.28
DNHC0-2	0.442396	0.10321	0.0535033	0.059736	0.103869	0.0642586	0.02221	0.0275537	0.123264	0	135	6.5	0.295	110.632	-0.19116	5.389	6.32	0.51
DNHC0-3	0.473119	0.109055	0.0415397	0.0356277	0.0882952	0.062761	0.0273777	0.022224	0.14	0	135	8	0.343	109.568	-0.07885	6.019	5.79	0.33
DNHC0-4	0.479589	0.108886	0.0423938	0.0114892	0.116724	0.050687	0.0180901	0.00723606	0.164905	0	135	7.5	0.297	118.505	-0.16606	5.389	5.86	0.4
DNHC-1	0.577384	0.115277	0.0768026	0.0328381	0.0602882	0.0709534	0.021796	0.0190466	0.0256143	1	135	37.5	0.735	84.2526	1.71627	7.429	9.43	1.51
DNHC-3	0.646283	0.111799	0.0694221	0.0312063	0.0279677	0.080433	0.00740635	0.0224997	0.00298368	1	135	39	0.729	147.442	1.75269	7.429	7.44	1.46
DNHC-4	0.594883	0.12408	0.0720142	0.0357762	0.0419254	0.0825672	0.0137207	0.0124198	0.0226138	1	135	39	0.744	126.379	1.8213	5.429	6.83	1.65

## Sheet: Sheet2
cumulative CO2 emission	1	4	7	13	30	80		CO2 efflux rate	1	4	7	13	30	80
TN0C0	60	222	291	708	825	1035		TN0C0	60	52.5	34.5	36	6.88235	4.2
TN0C0	45	204	258	690	813	1032		TN0C0	45	48	27	37.5	7.23529	4.38
TN0C0	57	222	279	687	810	1032		TN0C0	57	51	28.5	34.5	7.23529	4.44
TN0C-1	201	447	678	1212	1701	2367		TN0C-1	201	72	115.5	43.5	28.7647	13.32
TN0C-3	201	453	672	1194	1719	2370		TN0C-3	201	73.5	109.5	46.5	30.8824	13.02
TN0C-4	195	441	666	1188	1704	2367		TN0C-4	195	73.5	112.5	51	30.3529	13.26
TNLC0-2	66	225	309	603	708	993		TNLC0-2	66	45	42	24	6.17647	5.7
TNLC0-3	63	222	303	615	717	1005		TNLC0-3	63	42	40.5	25.5	6	5.76
TNLC0-4	69	222	312	615	720	999		TNLC0-4	69	43.5	45	30	6.17647	5.58
TNLC-1	99	294	567	1023	1491	2100		TNLC-1	99	51	136.5	42	27.5294	12.18
TNLC-2	102	336	591	1020	1434	2037		TNLC-2	102	75	127.5	43.5	24.3529	12.06
TNLC-3	114	360	627	1053	1485	2097		TNLC-3	114	73.5	133.5	42	25.4118	12.24
TNHC0-2	72	159	210	408	495	747		TNHC0-2	72	15	25.5	10.5	5.11765	5.04
TNHC0-3	75	171	225	426	516	753		TNHC0-3	75	16.5	27	13.5	5.29412	4.74
TNHC0-4	66	165	222	450	543	795		TNHC0-4	66	21	28.5	16.5	5.47059	5.04
TNHC-1	171	360	651	939	1287	1932		TNHC-1	171	42	145.5	19.5	20.4706	12.9
TNHC-2	186	375	669	1005	1356	1992		TNHC-2	186	45	147	22.5	20.6471	12.72
TNHC-3	198	390	690	1035	1392	2040		TNHC-3	198	46.5	150	21	21	12.96
MN0C0-1	171	321	369	660	744	900		MN0C0-1	171	40.5	24	12	4.94118	3.12
MN0C0-2	165	330	381	693	774	924		MN0C0-2	165	43.5	25.5	13.5	4.76471	3
MN0C0-3	174	339	393	684	753	909		MN0C0-3	174	40.5	27	16.5	4.05882	3.12
MN0C-1	216	420	759	1242	1650	2172		MN0C-1	216	49.5	169.5	33	24	10.44
MN0C-2	210	414	738	1236	1641	2163		MN0C-2	210	51	162	34.5	23.8235	10.44
MN0C-4	219	432	759	1218	1677	2190		MN0C-4	219	54	163.5	39	27	10.26
MNLC0-2	96	210	282	540	702	846		MNLC0-2	96	22.5	36	15	9.52941	2.88
MNLC0-3	105	207	285	552	723	873		MNLC0-3	105	19.5	39	16.5	10.0588	3
MNLC0-4	93	177	249	534	702	858		MNLC0-4	93	16.5	36	16.5	9.88235	3.12
MNLC-1	126	345	657	1074	1536	2055		MNLC-1	126	52.5	156	34.5	27.1765	10.38
MNLC-2	120	354	672	1104	1506	2019		MNLC-2	120	55.5	159	36	23.6471	10.26
MNLC-4	129	357	666	1116	1557	2061		MNLC-4	129	52.5	154.5	39	25.9412	10.08
MNHC0-1	57	183	216	432	501	693		MNHC0-1	57	34.5	16.5	10.5	4.05882	3.84
MNHC0-3	63	189	228	459	579	762		MNHC0-3	63	37.5	19.5	12	7.05882	3.66
MNHC0-4	60	186	228	468	543	729		MNHC0-4	60	34.5	21	15	4.41176	3.72
MNHC-1	102	300	594	903	1272	1839		MNHC-1	102	49.5	147	22.5	21.7059	11.34
MNHC-2	117	318	618	948	1341	1905		MNHC-2	117	54	150	27	23.1176	11.28
MNHC-4	114	324	612	951	1314	1866		MNHC-4	114	55.5	144	24	21.3529	11.04
DN0C0-2	81	174	213	441	483.84	579.84		DN0C0-2	81	21	19.5	7.5	2.52	1.92
DN0C0-3	75	165	201	423	468	558		DN0C0-3	75	18	18	10.5	2.64706	1.8
DN0C0-4	81	183	210	414	464	554		DN0C0-4	81	22.5	13.5	12	2.76471	1.8
DN0C-2	165	342	522	846	1230	1704		DN0C-2	165	42	90	22.5	22.5882	9.48
DN0C-3	165	342	525	858	1266	1734		DN0C-3	165	45	91.5	25.5	24	9.36
DN0C-4	159	336	525	852	1254	1725		DN0C-4	159	42	94.5	24	23.6471	9.42
DNLC0-1	60	162	195	390	431.99	518.99		DNLC0-1	60	28.5	16.5	6	2.47	1.74
DNLC0-2	69	180	219	384	423	513		DNLC0-2	69	30	19.5	4.5	2.29412	1.8
DNLC0-3	60	162	189	375	405	483		DNLC0-3	60	27	13.5	9	1.76471	1.56
DNLC-2	114	285	495	834	1185	1629		DNLC-2	114	33	105	31.5	20.6471	8.88
DNLC-3	105	273	492	834	1206	1596		DNLC-3	105	34.5	109.5	37.5	21.8824	7.8
DNLC-4	111	285	489	831	1173	1560		DNLC-4	111	37.5	102	34.5	20.1176	7.74
DNHC0-2	45	99	144	295	346	469		DNHC0-2	45	7.5	22.5	6.5	3	2.46
DNHC0-3	51	132	171	343	400	514		DNHC0-3	51	12	19.5	8	3.35294	2.28
DNHC0-4	45	108	135	297	348	462		DNHC0-4	45	7.5	13.5	7.5	3	2.28
DNHC-1	126	282	441	735	1137	1575		DNHC-1	126	22.5	79.5	37.5	23.6471	8.76
DNHC-3	129	288	435	729	1104	1536		DNHC-3	129	21	73.5	39	22.0588	8.64
DNHC-4	123	273	426	744	1128	1563		DNHC-4	123	21	76.5	39	22.5882	8.7
